# Supplementary material for: Positive cytoplasmic UCHL5 tumor expression in gastric cancer is linked to improved prognosis
Source: PubMed Central journal article supplement (PMC5825037; doi:10.1371/journal.pone.0193125), 2018-02-23
Supplement: pone.0193125.s001.pdf [file pone.0193125.s001.pdf]

**Supplementary Table 1.** Cox regression analysis for cancer-specific survival of stage I-II gastric cancer patients.

|                              | Univariable survival analysis |            |                | Multivariable survival analysis |           |                |
|------------------------------|-------------------------------|------------|----------------|---------------------------------|-----------|----------------|
|                              | Hazard ratio                  | 95% CI     | <i>p</i> value | Hazard ratio                    | 95% CI    | <i>p</i> value |
| <b>Age, years</b>            |                               |            |                |                                 |           |                |
| <66                          | 1.00                          |            |                | 1.00                            |           |                |
| ≥66                          | 3.18                          | 1.72-5.88  | <0.001         | 2.92                            | 1.54-5.56 | 0.001          |
| <b>Gender</b>                |                               |            |                |                                 |           |                |
| Male                         | 1.00                          |            |                | 1.00                            |           |                |
| Female                       | 0.76                          | 0.44-1.30  | 0.315          | 0.70                            | 0.40-1.22 | 0.207          |
| <b>TNM stage</b>             |                               |            |                |                                 |           |                |
| IA-IB                        | 1.00                          |            |                | 1.00                            |           |                |
| IIA-IIB                      | 4.14                          | 2.24-7.64  | <0.001         | 2.71                            | 1.38-5.29 | 0.004          |
| <b>pT classification</b>     |                               |            |                |                                 |           |                |
| pT1                          | 1.00                          |            |                | -                               |           |                |
| pT2                          | 3.30                          | 1.28-8.51  | 0.014          | -                               | -         | -              |
| pT3                          | 9.40                          | 3.91-22.60 | <0.001         | -                               | -         | -              |
| pT4                          | 2.78                          | 0.34-23.13 | 0.343          | -                               | -         | -              |
| <b>pN classification</b>     |                               |            |                |                                 |           |                |
| pN0                          | 1.00                          |            |                | -                               | -         | -              |
| pN+                          | 1.53                          | 0.84-2.78  | 0.164          | -                               | -         | -              |
| <b>Laurén classification</b> |                               |            |                |                                 |           |                |
| Intestinal                   | 1.00                          |            |                | -                               |           |                |
| Diffuse                      | 1.09                          | 0.63-1.89  | 0.761          | -                               | -         | -              |
| <b>Tumor size, cm</b>        |                               |            |                |                                 |           |                |
| <5                           | 1.00                          |            |                | 1.00                            |           |                |
| ≥5                           | 3.49                          | 1.99-6.11  | <0.001         | 2.42                            | 1.29-4.53 | 0.006          |
| <b>UCL5</b>                  |                               |            |                |                                 |           |                |
| Negative                     | 1.00                          |            |                | 1.00                            |           |                |
| Positive                     | 0.52                          | 0.29-0.93  | 0.028          | 0.35                            | 0.19-0.65 | 0.001          |

Abbreviations: UCL5 = ubiquitin C-terminal hydrolase L5, CI = confidence interval
