# Supplementary material for: Positive cytoplasmic UCHL5 tumor expression in gastric cancer is linked to improved prognosis
Source: PubMed Central journal article supplement (PMC5825037; doi:10.1371/journal.pone.0193125), 2018-02-23
Supplement: pone.0193125.s002.pdf [file pone.0193125.s002.pdf]

**Supplementary Table 2.** Cox regression analysis for cancer-specific survival of gastric cancer patients with small (<5 cm) tumors.

|                              | Univariable survival analysis |             |                | Multivariable survival analysis |              |                |
|------------------------------|-------------------------------|-------------|----------------|---------------------------------|--------------|----------------|
|                              | Hazard ratio                  | 95% CI      | <i>p</i> value | Hazard ratio                    | 95% CI       | <i>p</i> value |
| <b>Age, years</b>            |                               |             |                |                                 |              |                |
| <66                          | 1.00                          |             |                | 1.00                            |              |                |
| ≥66                          | 2.30                          | 1.37-3.87   | 0.002          | 3.67                            | 2.11-6.37    | <0.001         |
| <b>Gender</b>                |                               |             |                |                                 |              |                |
| Male                         | 1.00                          |             |                | 1.00                            |              |                |
| Female                       | 0.65                          | 0.39-1.07   | 0.091          | 0.70                            | 0.41-1.19    | 0.189          |
| <b>TNM stage</b>             |                               |             |                |                                 |              |                |
| IA-IB                        | 1.00                          |             |                | 1.00                            |              |                |
| IIA-IIB                      | 2.53                          | 1.07-5.95   | 0.034          | 2.29                            | 0.96-5.42    | 0.061          |
| IIIA-IIIC                    | 9.25                          | 4.58-18.70  | <0.001         | 10.30                           | 5.06-20.96   | <0.001         |
| IV                           | 35.22                         | 15.25-81.33 | <0.001         | 44.70                           | 18.18-109.90 | <0.001         |
| <b>pT classification</b>     |                               |             |                |                                 |              |                |
| pT1                          | 1.00                          |             |                | -                               |              |                |
| pT2                          | 2.30                          | 0.96-5.48   | 0.060          | -                               | -            | -              |
| pT3                          | 6.61                          | 2.97-14.73  | <0.001         | -                               | -            | -              |
| pT4                          | 10.87                         | 4.58-25.77  | <0.001         | -                               | -            | -              |
| <b>pN classification</b>     |                               |             |                |                                 |              |                |
| pN0                          | 1.00                          |             |                | -                               |              |                |
| pN+                          | 5.64                          | 3.17-10.03  | <0.001         | -                               | -            | -              |
| <b>pM classification</b>     |                               |             |                |                                 |              |                |
| pM0                          | 1.00                          |             |                | -                               |              |                |
| pM1                          | 12.06                         | 6.29-23.12  | <0.001         | -                               | -            | -              |
| <b>Laurén classification</b> |                               |             |                |                                 |              |                |
| Intestinal                   | 1.00                          |             |                | -                               |              |                |
| Diffuse                      | 0.78                          | 0.47-1.29   | 0.326          | -                               | -            | -              |
| <b>UCHL5</b>                 |                               |             |                |                                 |              |                |
| Negative                     | 1.00                          |             |                | 1.00                            |              |                |
| Positive                     | 0.43                          | 0.26-0.71   | 0.001          | 0.39                            | 0.23-0.66    | <0.001         |

Abbreviations: UCHL5 = ubiquitin C-terminal hydrolase L5, CI = confidence interval
